# Supplementary material
Source: PubMed Central journal article supplement (PMC4225523)
Supplement: NIHMS60725-supplement-2.pdf [file NIHMS60725-supplement-2.pdf]

for pairwise comparison:

|         |         |
|---------|---------|
| MS20M03 | LW22F02 |
| MS20M05 | LW22F04 |
| MS20U10 | LW22F06 |
| MS20U11 | LW22F07 |
| MS20U13 | LW22M07 |
| MS21M05 | LW36F01 |
| MS21M07 | LW36F03 |
| MS21M08 | LW36F05 |
| MS21M14 | LW36F06 |

Individuals from 4 pig groups that the 2 selected breeds are compared to:

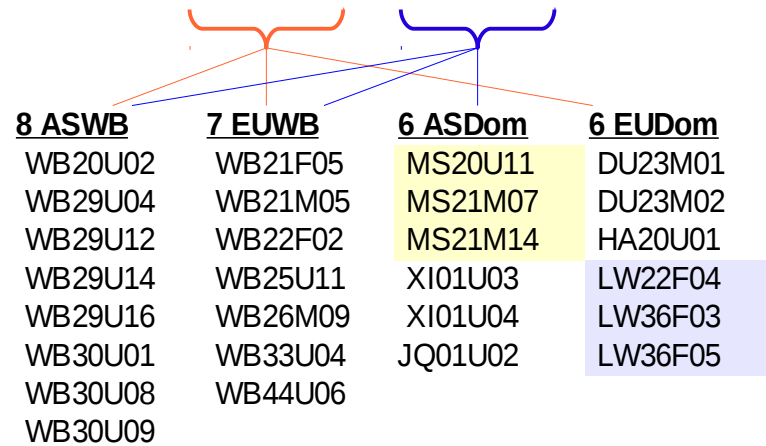

Number of pairwise comparisons with:

|  | Meishans | Large whites |    |    |  |
|--|----------|--------------|----|----|--|
|  | 72       | 63           | -  | 54 |  |
|  | 72       | 63           | 54 | -  |  |
