# Supplementary material
Source: PubMed Central journal article supplement (PMC4225523)

# Distribution of haplotypes that are shared in Large white pig LW22F07

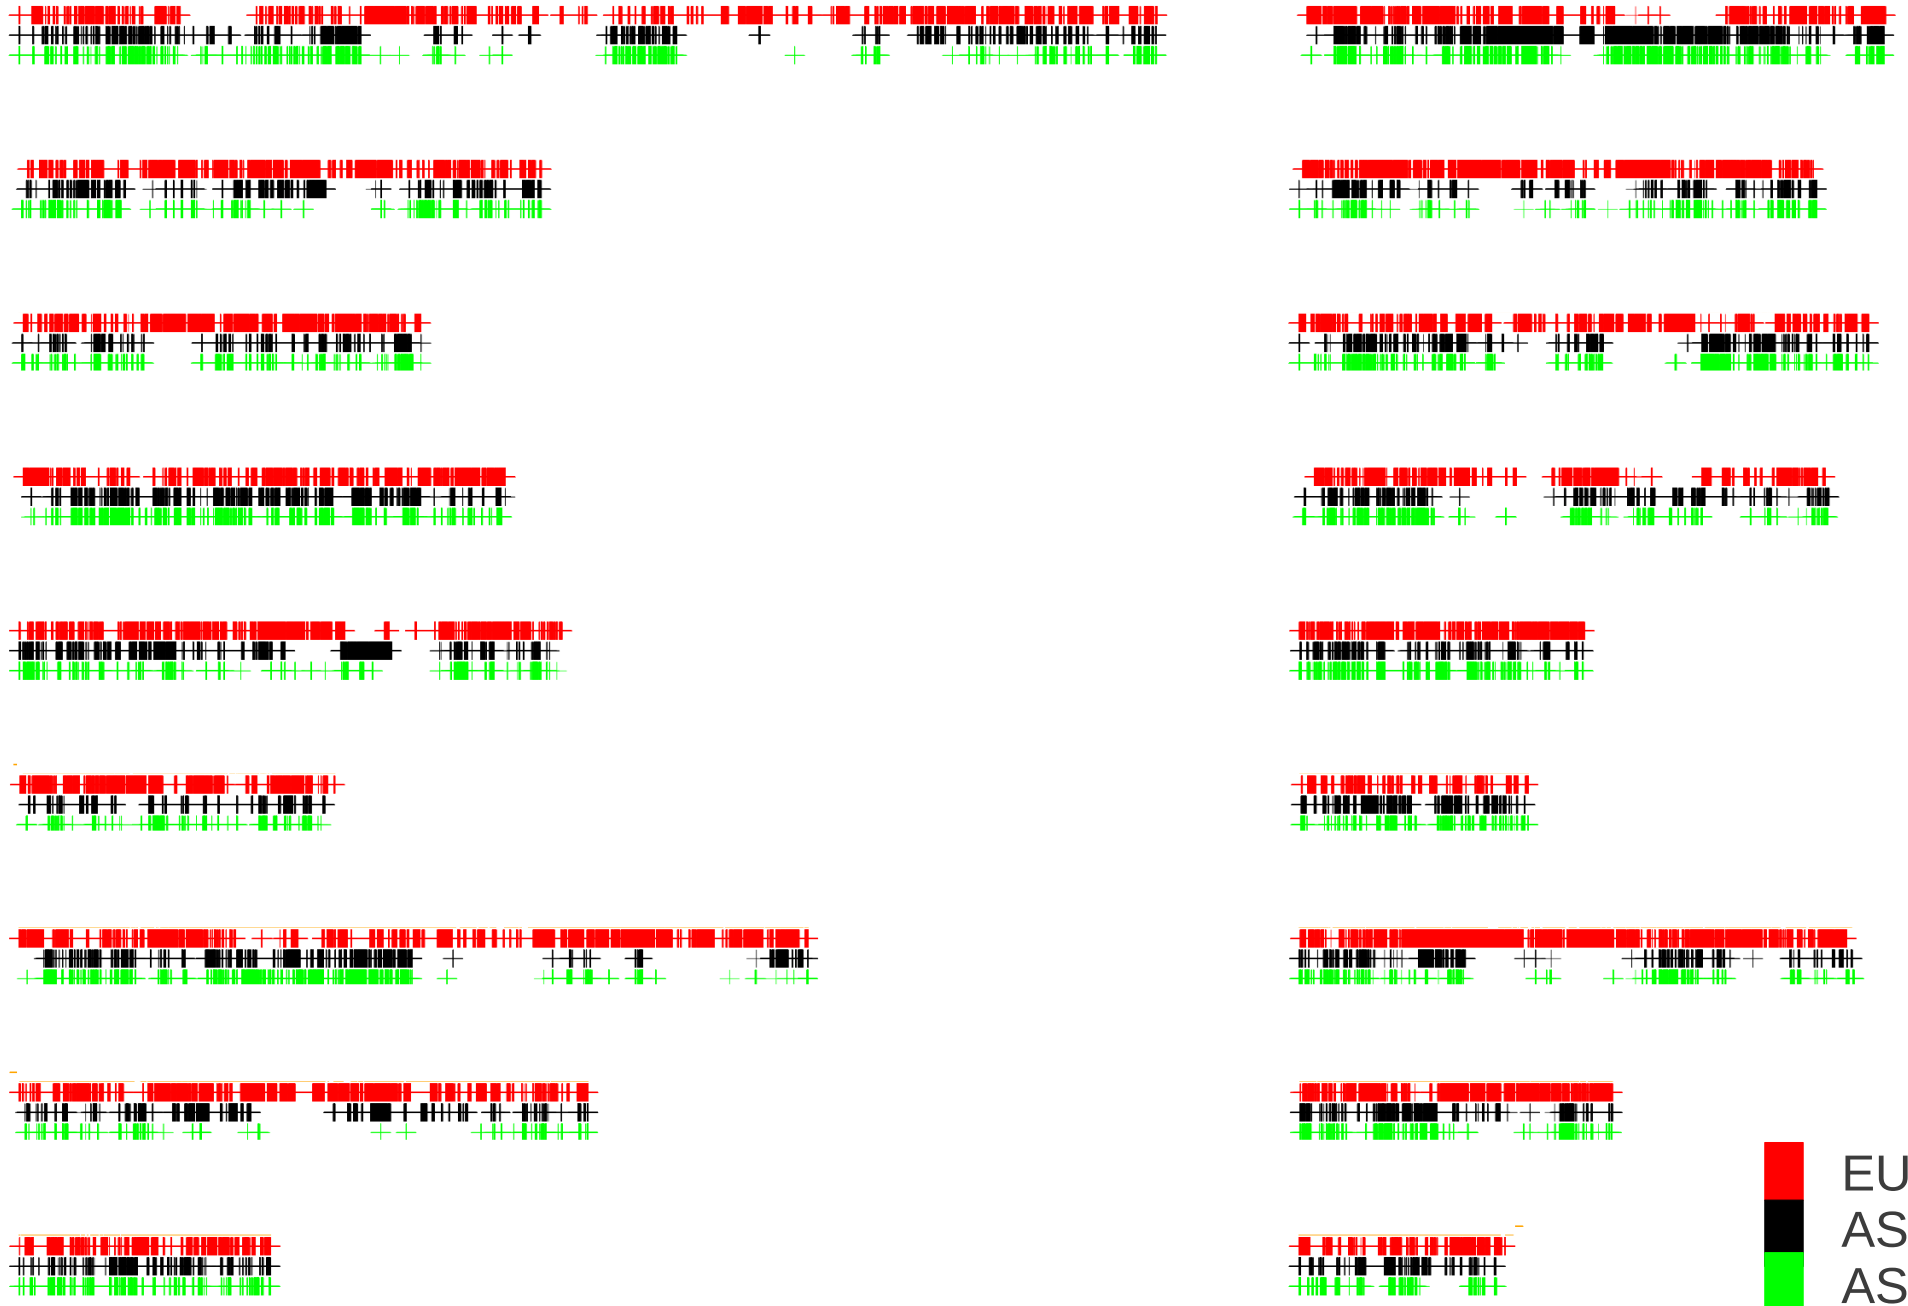

Supplement: NIHMS60725-supplement-4.pdf [file NIHMS60725-supplement-4.pdf]

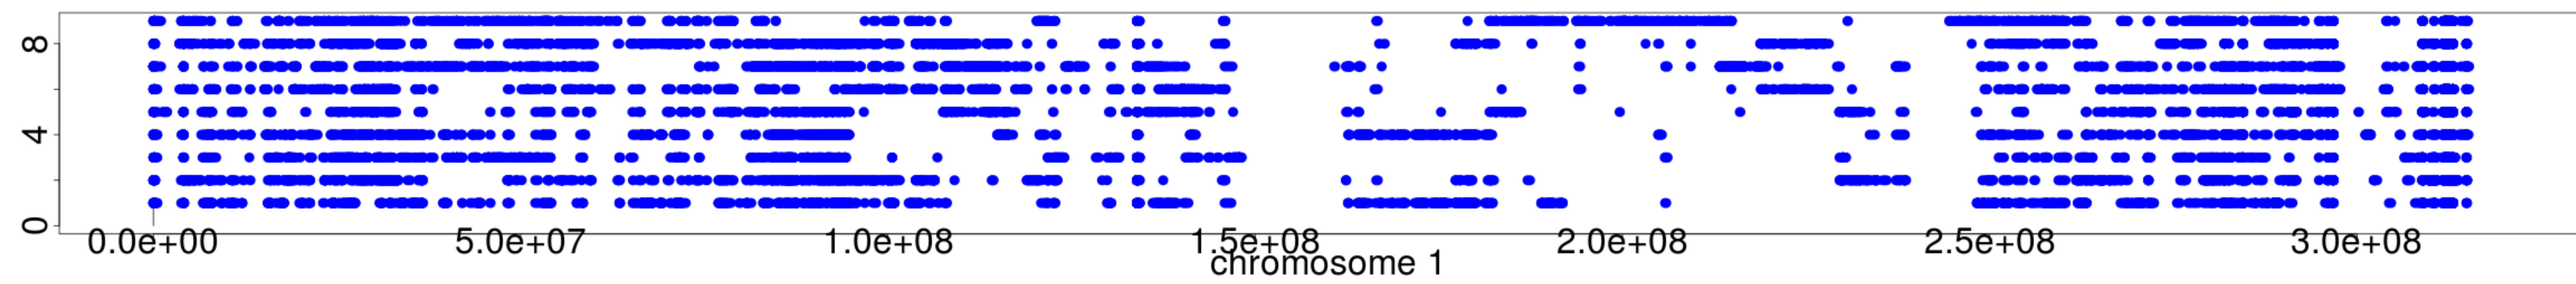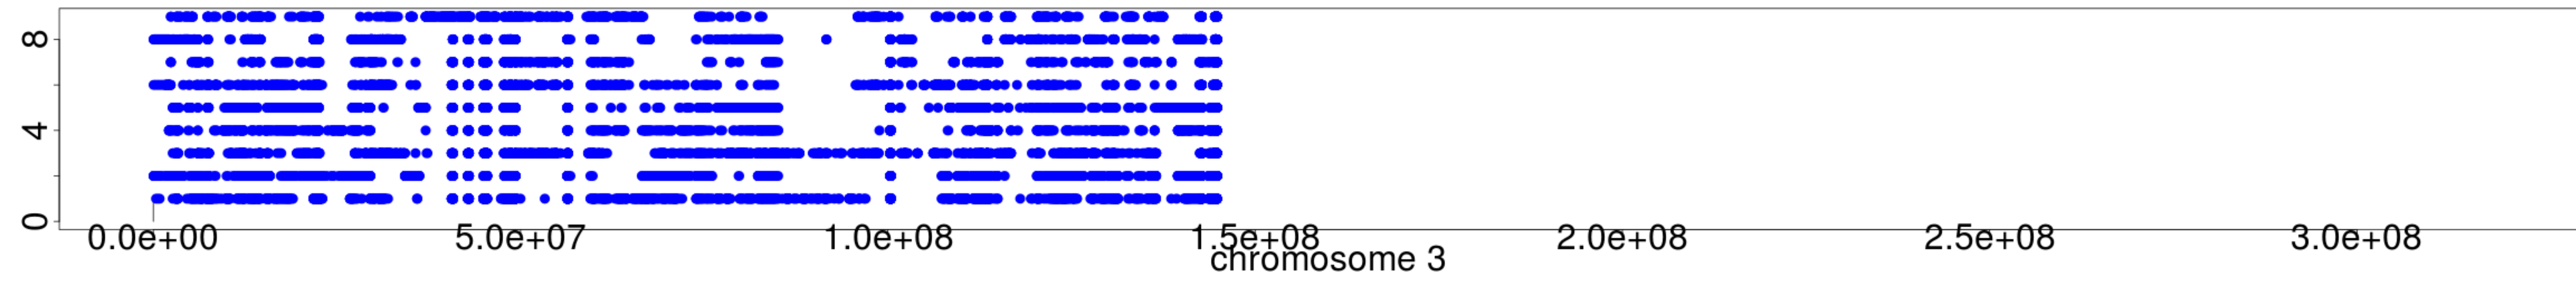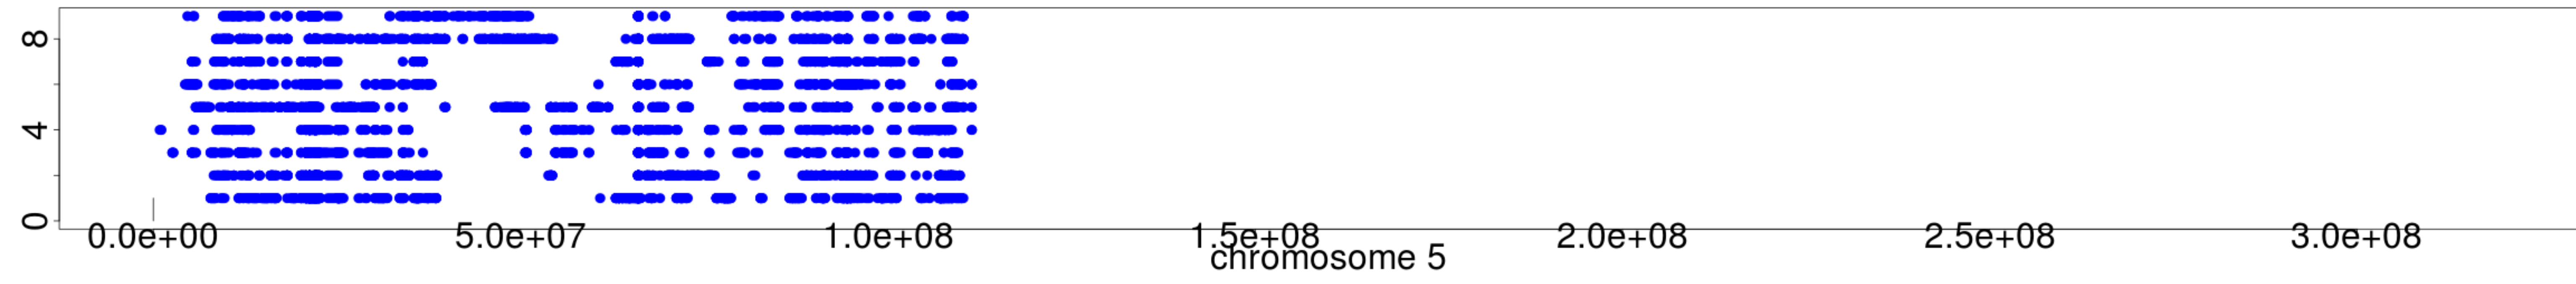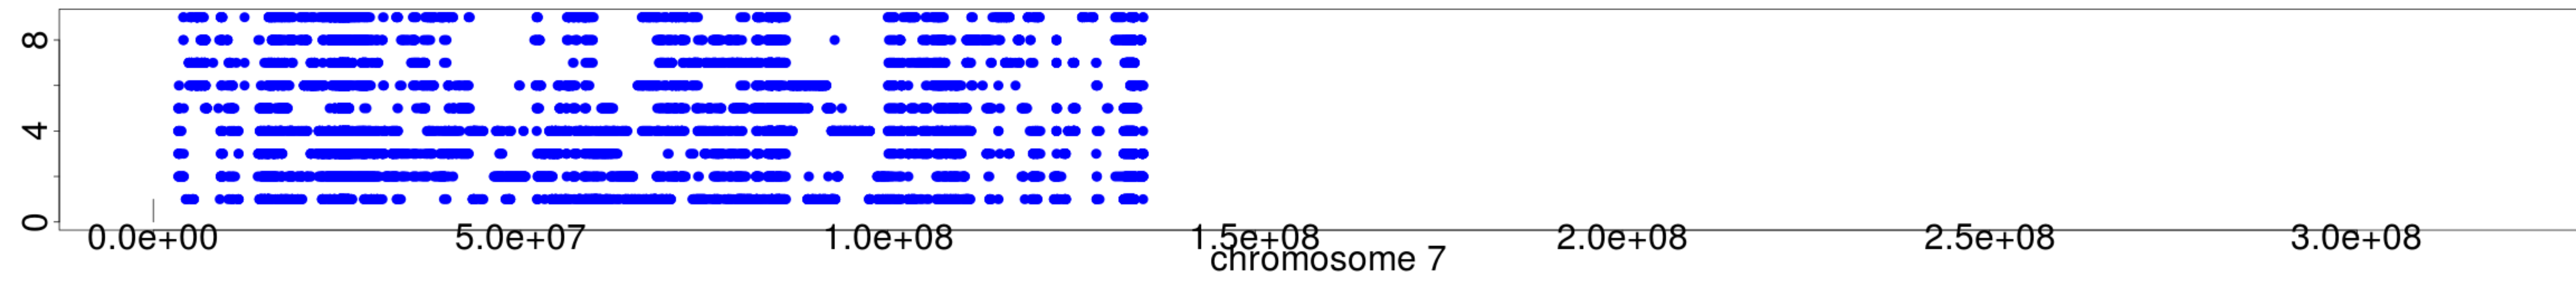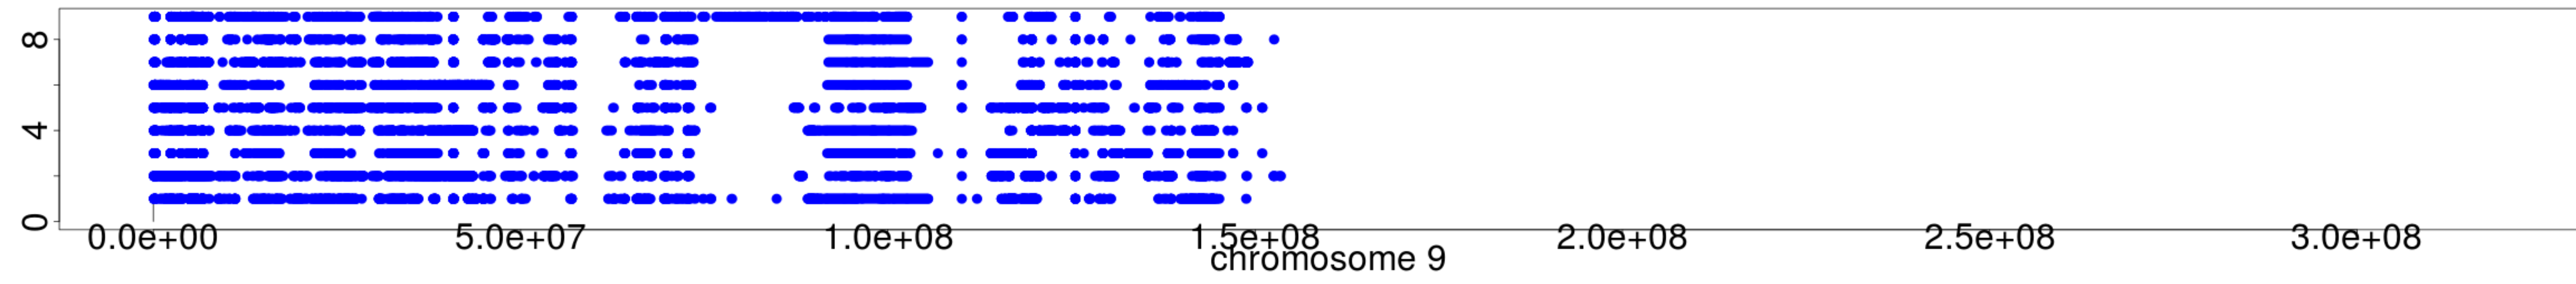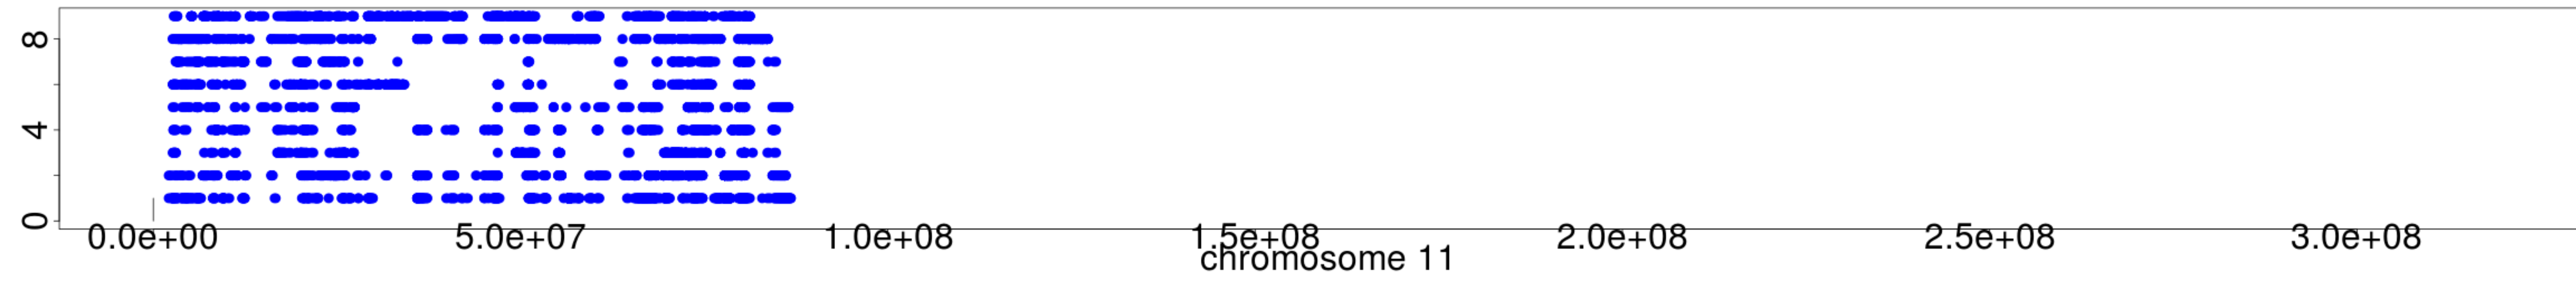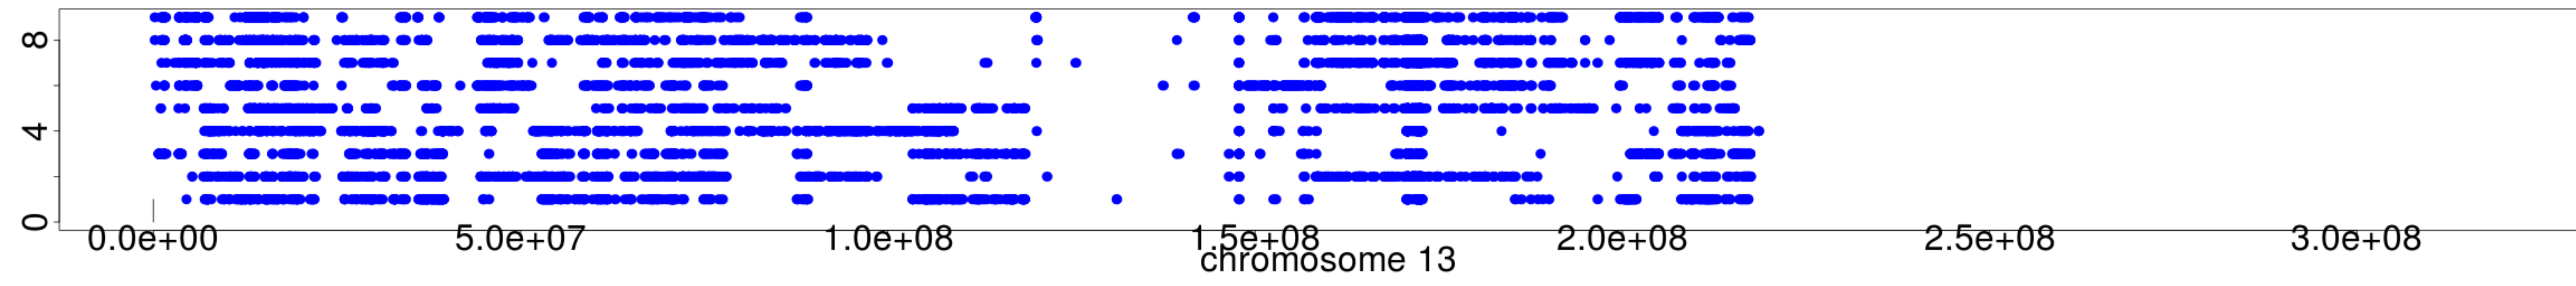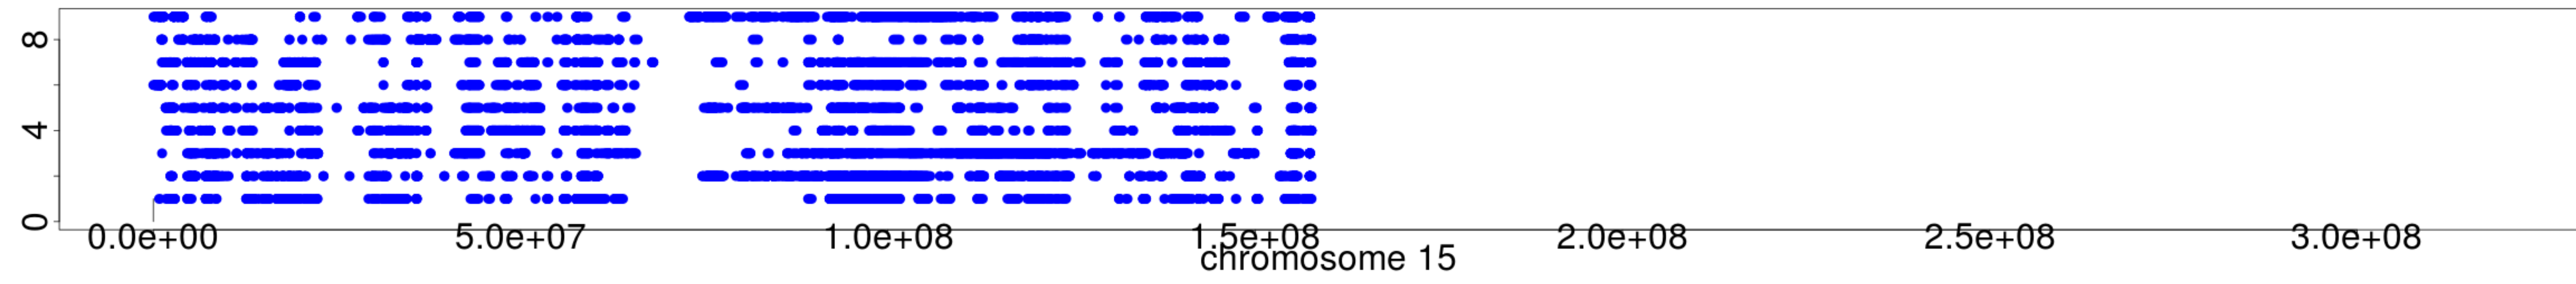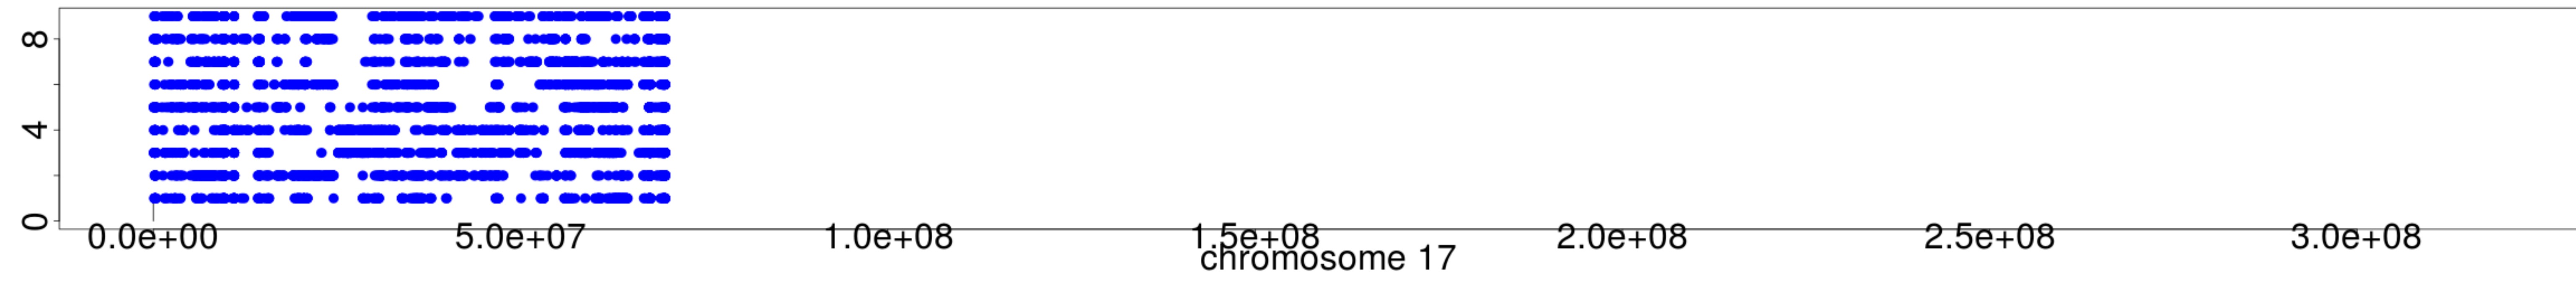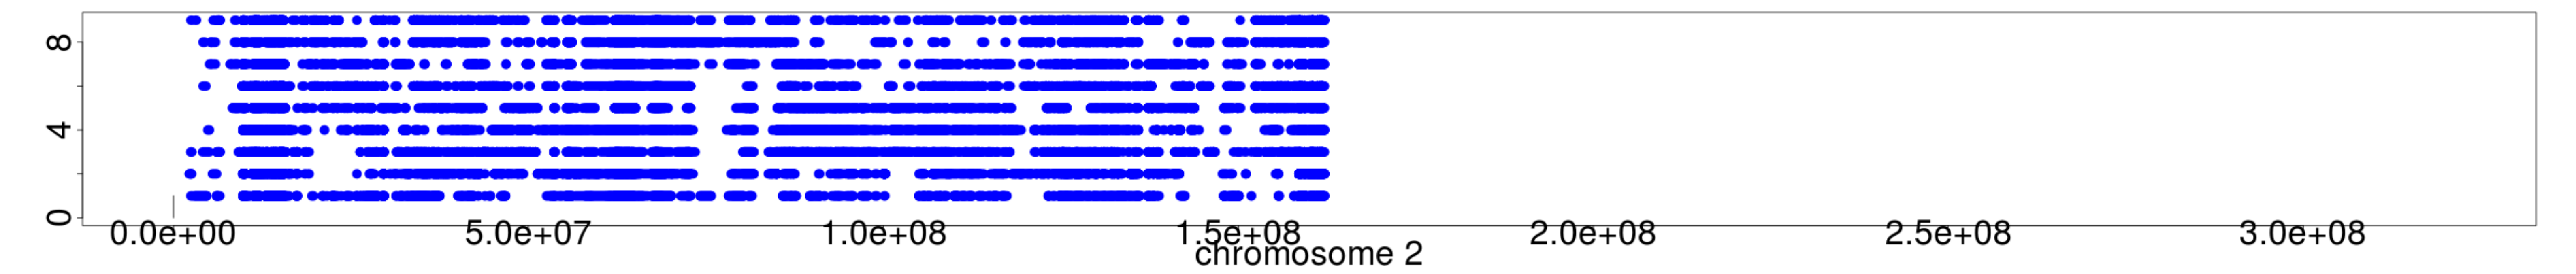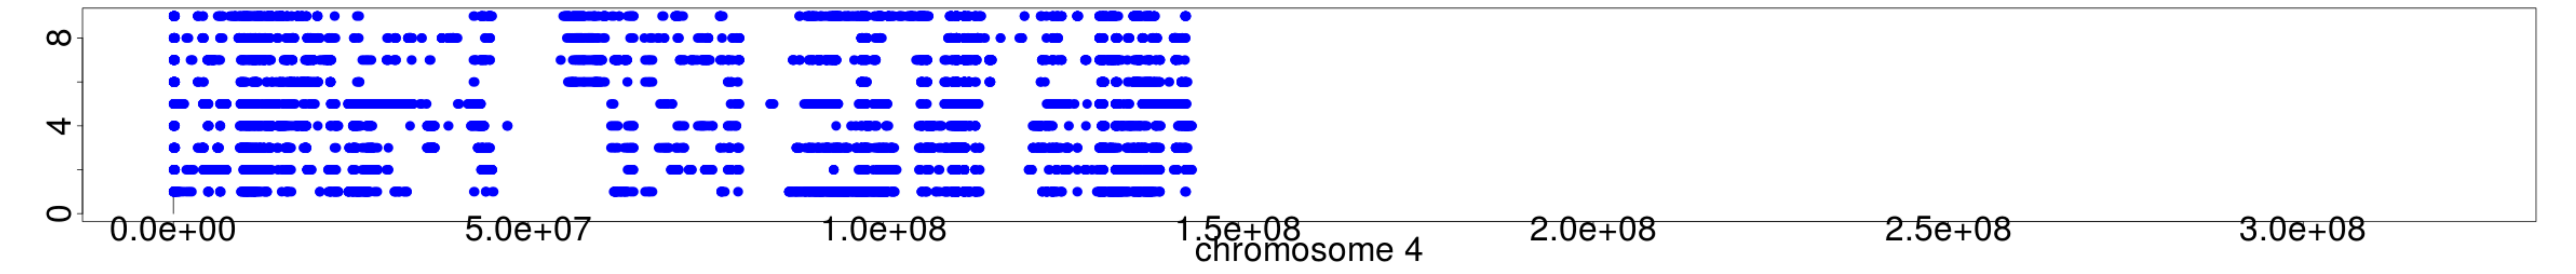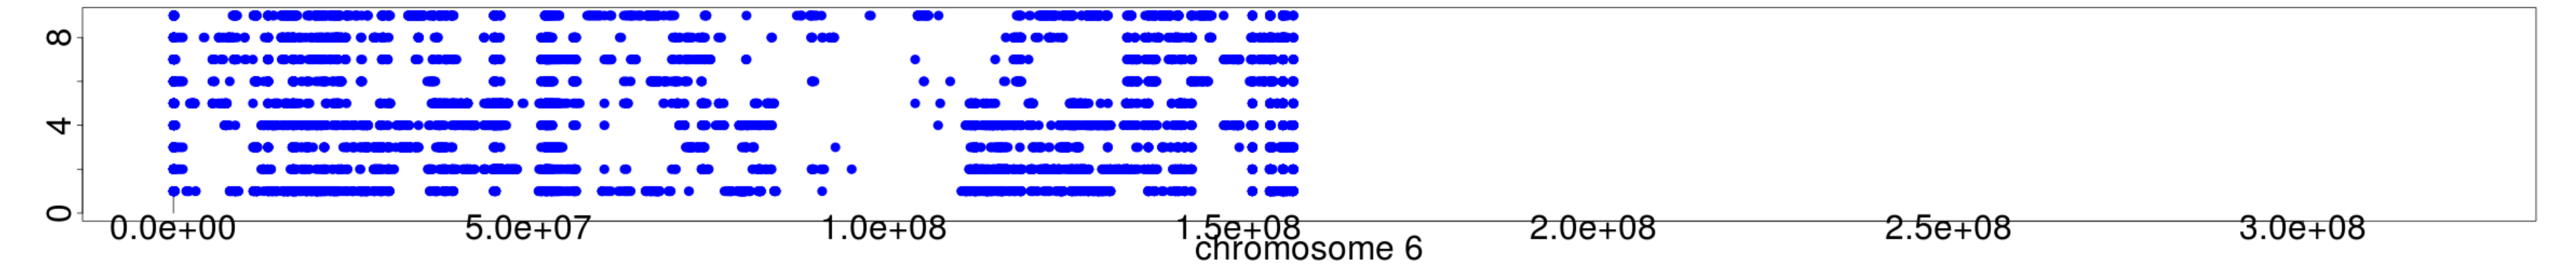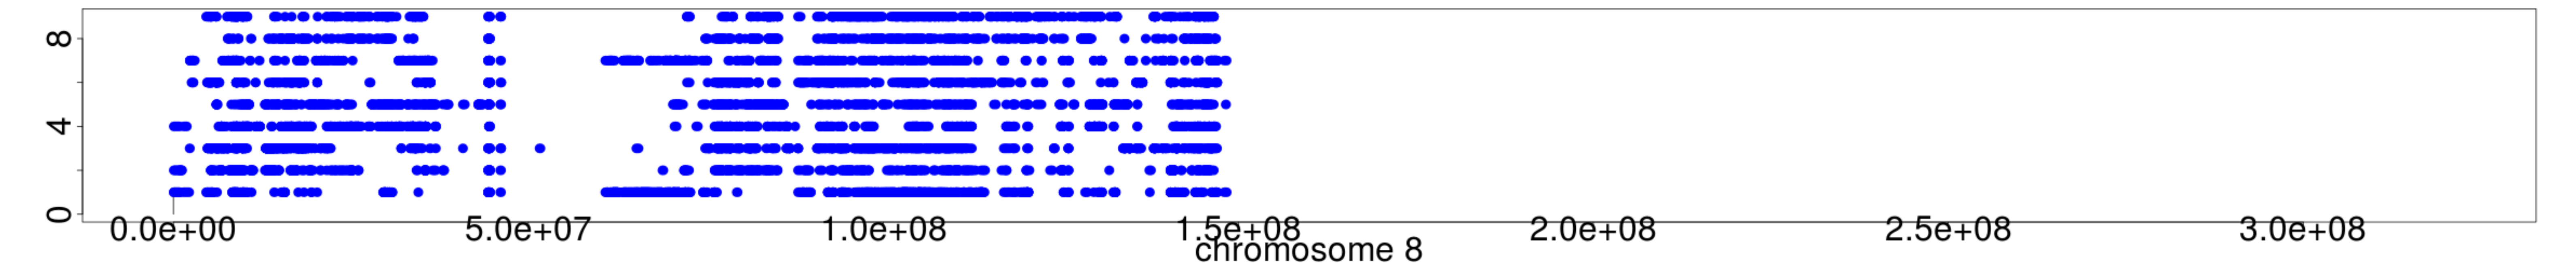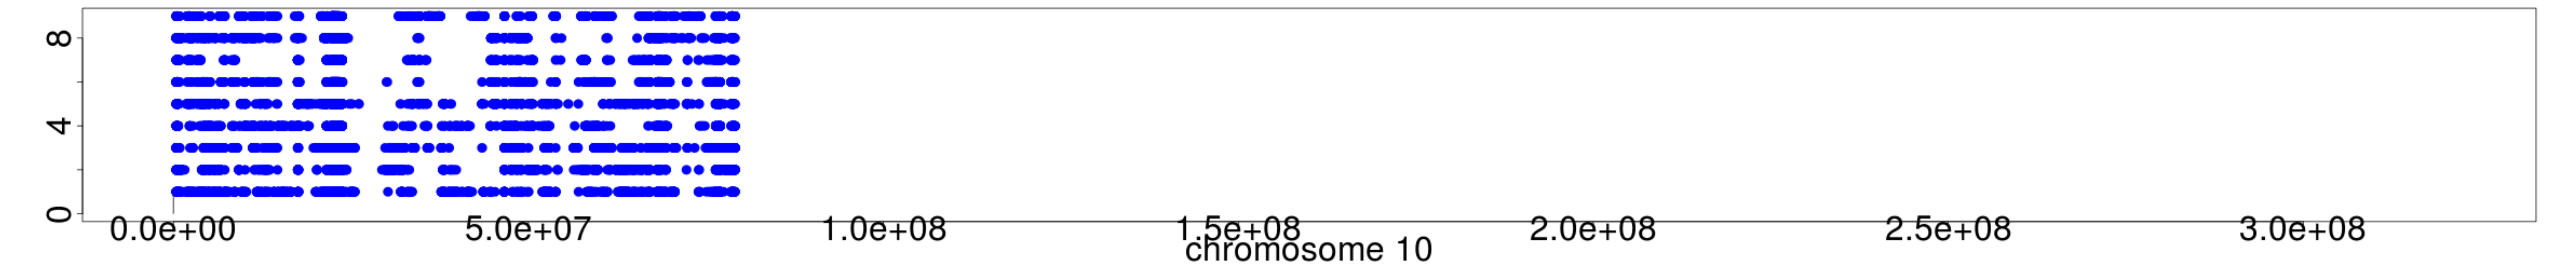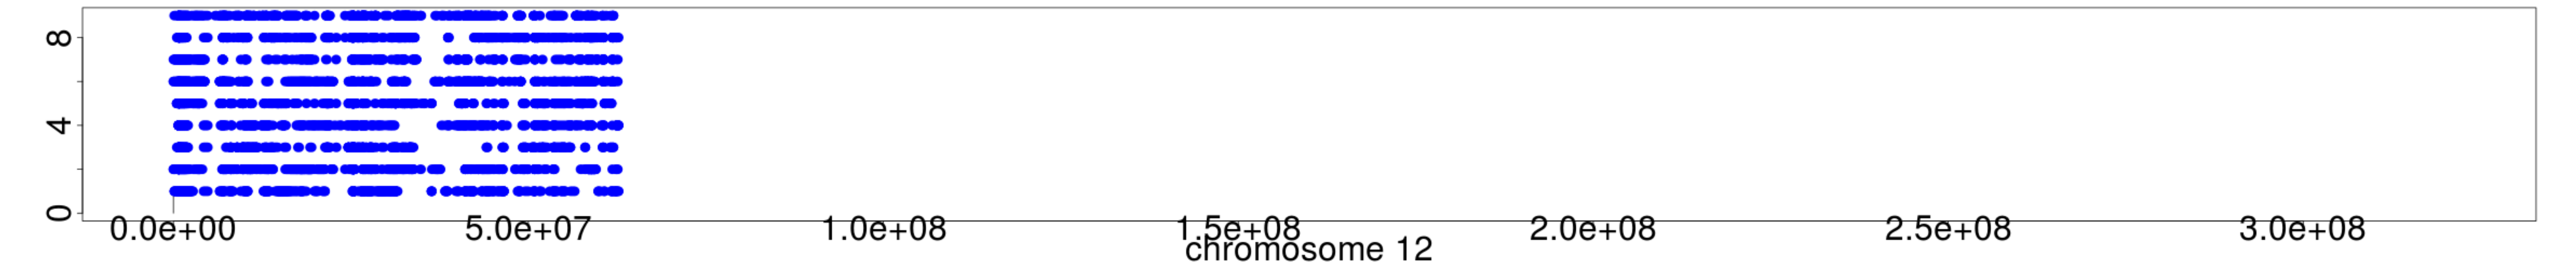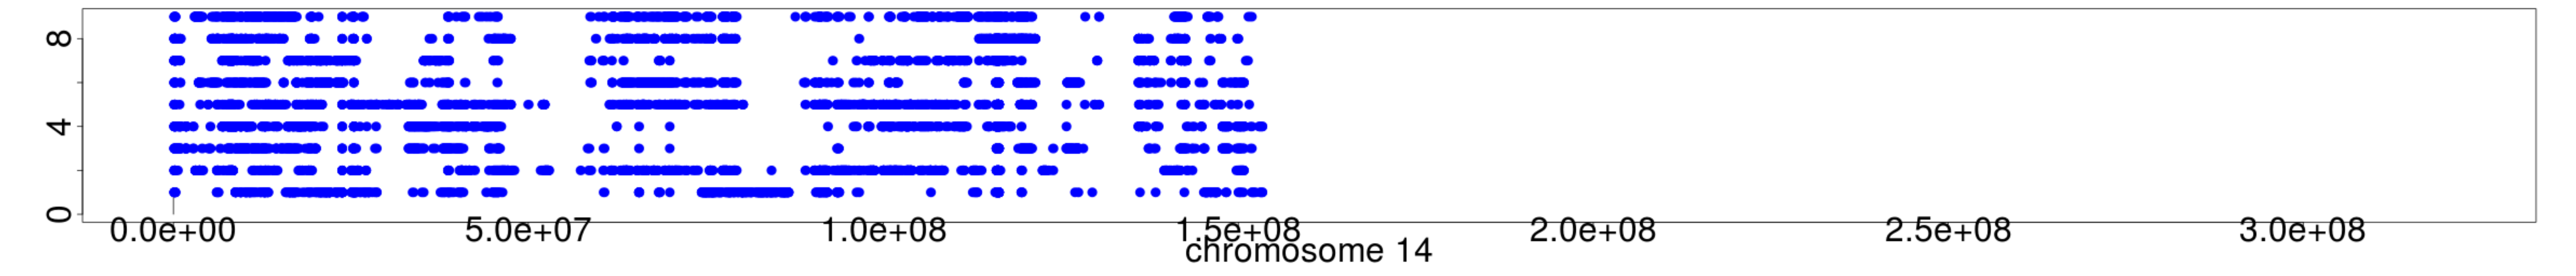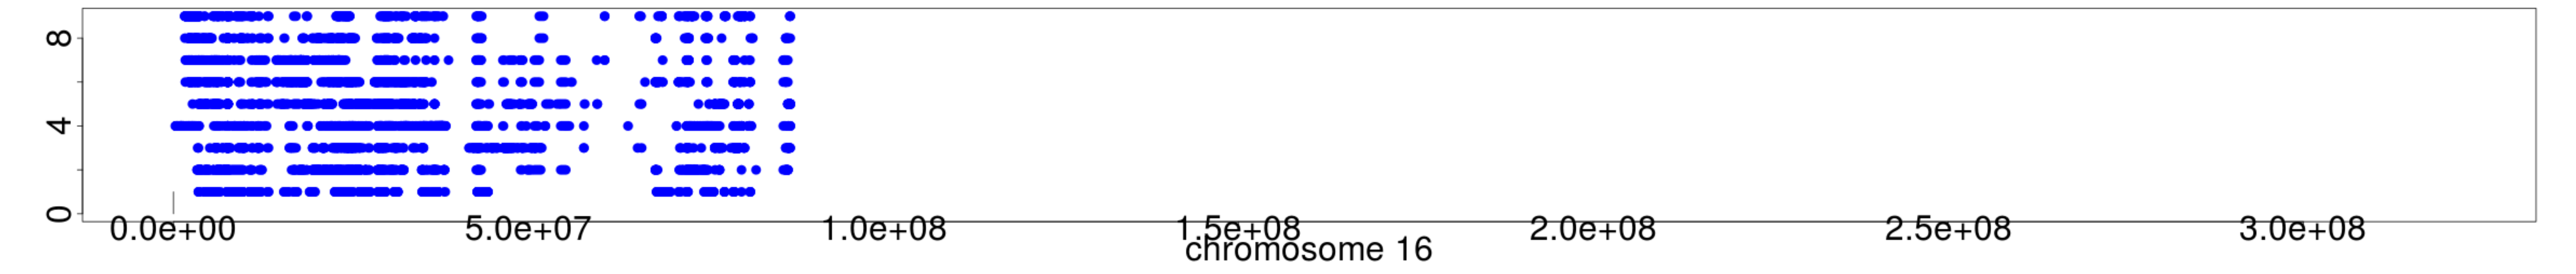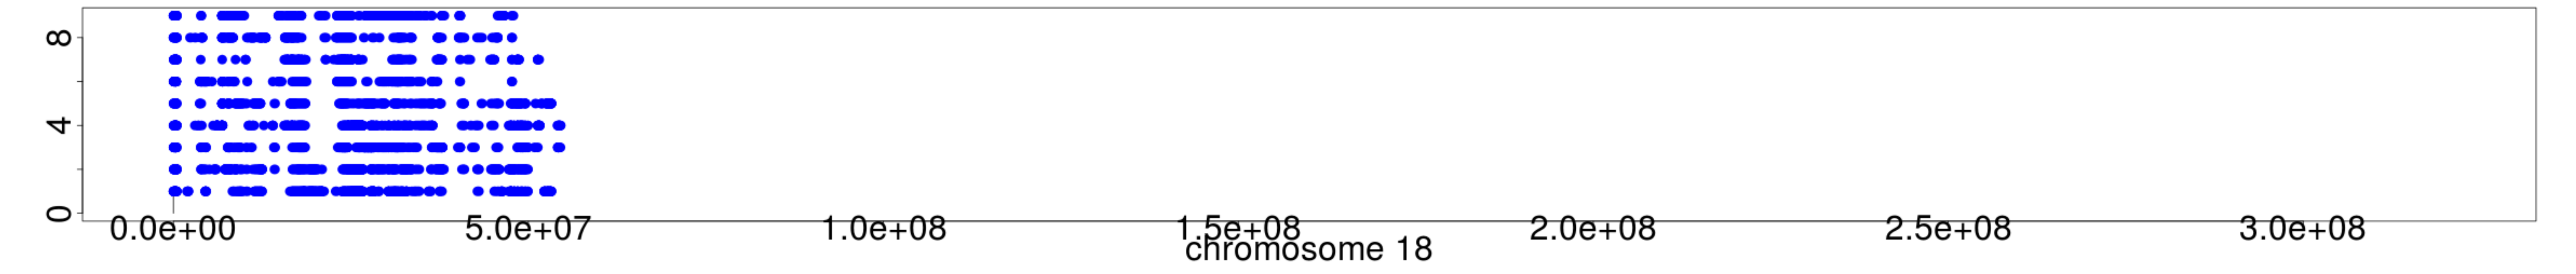

Supplement: NIHMS60725-supplement-5.pdf [file NIHMS60725-supplement-5.pdf]
